## BRIEF REPORT

# Effect of Levo-Thyroxine Replacement on Non-High-Density Lipoprotein Cholesterol in Hypothyroid Patients

Mitsuru Ito, Takeshi Arishima, Takumi Kudo, Eijun Nishihara, Hidemi Ohye, Sumihisa Kubota, Shuji Fukata, Nobuyuki Amino, Kanji Kuma, Ichiro Sasaki, Tetsuya Hiraiwa, Toshiaki Hanafusa, Junta Takamatsu, and Akira Miyauchi

*Kuma Hospital (M.I., T.A., T.K., E.N., H.O., S.K., S.F., N.A., K.K., A.M.), Kobe-City, Hyogo 650-0011, Japan; the First Department of Medicine (I.S., T.Hi., T.Ha.), Osaka Medical College, Takatsuki-City, Osaka 569-8686, Japan; and Takamatsu Thyroid Clinic (J.T.), Takatsuki-City, Osaka 569-0804, Japan*

**Context:** Recently, non-high-density lipoprotein cholesterol (non-HDL-C), a measure of total cholesterol minus HDL-C, has emerged as a predictor of cardiovascular disease.

**Objective:** We evaluated the effect of L-T<sub>4</sub> replacement on non-HDL-C levels in patients with primary hypothyroidism.

**Methods:** Thirteen patients with overt hypothyroidism and 26 patients with subclinical hypothyroidism participated in the study. The lipid profiles, including non-HDL-C, were measured in patients with hypothyroidism before and 3 months after L-T<sub>4</sub> replacement was started.

**Results:** After L-T<sub>4</sub> replacement, the serum concentrations of all lipoproteins, exclusive of lipoprotein (a) [Lp(a)], were significantly decreased in patients with overt hypothyroidism. In patients with subclinical hypothyroidism, the serum concentrations of total cholesterol,

non-HDL-C, remnant-like particle cholesterol, and apolipoprotein B (Apo B) were significantly decreased, whereas no significant changes in the serum concentrations of low-density lipoprotein cholesterol, HDL-C, triglycerides, apolipoprotein A-I, and Lp(a) were observed. In all 39 patients, the reduction in the non-HDL-C levels correlated with the reduction in the low-density lipoprotein cholesterol, remnant-like particle cholesterol, and Apo B levels. However, the reduction in the non-HDL-C levels did not correlate with the reduction in the HDL-C, Lp(a), and apolipoprotein A-I levels.

**Conclusions:** This study is the first to show that L-T<sub>4</sub> replacement may reduce serum concentrations of non-HDL-C in patients with hypothyroidism. The study also suggests that such altered serum concentrations of non-HDL-C in hypothyroidism may be related to the disturbed metabolism of low-density lipoprotein, remnant lipoprotein, and Apo B. (*J Clin Endocrinol Metab* 92: 608–611, 2007)

ELEVATED LEVELS OF low-density lipoprotein cholesterol (LDL-C) have been consistently associated with an increased risk for development of cardiovascular disease (1). Therefore, LDL-C is a major therapeutic target in the treatment of dyslipidemia (2). However, the use of the non-high-density lipoprotein cholesterol (non-HDL-C) level has been suggested as a better tool for risk and treatment assessments than the LDL-C level (3). The non-HDL-C level is defined as the difference between the total cholesterol (TC) and HDL-C levels. The reason this recommendation has been made is that non-HDL-C includes all cholesterol present in lipoprotein particles considered to be atherogenic, including LDL, lipoprotein (a) [Lp(a)], intermediate-density lipoprotein, and very low-density lipoprotein remnants. Non-HDL-C has been shown in a variety of studies to be predictive of cardiovascular disease (4).

First Published Online December 5, 2006

Abbreviations: Apo A-I, Apolipoprotein A-I; Apo B, apolipoprotein B; HDL-C, high-density lipoprotein cholesterol; LDL-C, low-density lipoprotein cholesterol; Lp(a), lipoprotein (a); OH, overt hypothyroidism; RLP-C, remnant-like particle cholesterol; SH, subclinical hypothyroidism; TC, total cholesterol; TG, triglyceride.

JCEM is published monthly by The Endocrine Society (<http://www.endo-society.org>), the foremost professional society serving the endocrine community.

Hypothyroidism is associated with an atherogenic lipid profile, including greater serum concentrations of LDL-C (5) or Lp(a) (6). We reported the disturbed metabolism of remnant lipoprotein in overt hypothyroidism (OH) (7) and subclinical hypothyroidism (SH) (8).

In the present study, we measured the serum concentrations of non-HDL-C in patients with OH and SH before and after free T<sub>4</sub> replacement to investigate the effect of thyroid hormone replacement on non-HDL-C in patients with hypothyroidism.

## Patients and Methods

### Patients

We recruited 13 patients with OH (mean  $\pm$  SD, age, 53  $\pm$  17 yr; mean body mass index, 23.9  $\pm$  3.4 kg/m<sup>2</sup>) and 26 patients with SH (age, 55  $\pm$  17 yr; mean body mass index, 22.4  $\pm$  3.3 kg/m<sup>2</sup>) who had been referred to Kuma Hospital in Kobe, Japan. OH was diagnosed on the basis of elevated serum TSH levels and lowered free T<sub>4</sub> levels. SH was diagnosed on the basis of elevated serum TSH levels ( $\geq$ 6 mU/liter) and free thyroid hormone levels (free T<sub>4</sub> and free T<sub>3</sub>) within the normal range. The condition of hypothyroidism in each patient was stable because patients with OH had to have been in a documented hypothyroid state for at least 1 month and patients with SH for at least 3 months before enrollment. The causes of OH included Hashimoto thyroiditis (n = 7) and radioiodine therapy (3 to 16 yr previously; n = 6) for hyperthyroidism. The causes of SH included Hashimoto thyroiditis (n = 14) and thyroid

surgery (2 to 15 yr previously; *n* = 5) or radioiodine therapy (3 to 10 yr previously; *n* = 7) for hyperthyroidism. None of the patients had a history of coronary heart disease, acute illness, pregnancy, or disorders that affect lipid metabolism (e.g. diabetes mellitus, renal failure, nephrotic syndrome, or pancreatitis). None of the patients were on a thyroid hormone therapy or lipid-lowering agent at study entry. All patients gave their informed consent for the study, which was approved by the Institutional Ethics Committee.

### Study protocol

After both the patients with OH and SH fasted overnight, blood samples at the baseline were drawn to determine the serum lipid concentrations and thyroid function tests. L-T<sub>4</sub> replacement was then initiated (25 or 50 µg/d) in the patients. All patients were advised to maintain their dietary habits during the study period. To normalize the serum TSH levels, the L-T<sub>4</sub> dosage was adjusted according to the serum TSH concentrations measured at 4-wk intervals after L-T<sub>4</sub> replacement was initiated. The mean final dose of L-T<sub>4</sub> required to normalize the serum TSH levels was 83 ± 31 µg/d in the patients with OH and 47 ± 18 µg/d in the patients with SH. The lipid profiles were evaluated 3 months after treatment was started.

### Laboratory determinations

The levels of TC, HDL-C, and triglycerides (TG) were measured by enzyme assays. The non-HDL-C levels were calculated as TC – HDL-C. The LDL-C levels were calculated by the Friedewald formula. None of our patients had high serum concentrations of TG greater than 4.52 mmol/liter that would have limited the calculation of LDL. The serum Lp(a) concentration was measured using a latex agglutination assay (Daiichi Pure Chemicals Co., Ltd., Tokyo, Japan). Apolipoprotein B (Apo B) and apolipoprotein A-I (Apo A-I) were measured by immunoturbidimetry. The remnant-like particle cholesterol (RLP-C) was prepared using an immunoseparation technique (Japan Immunoresearch Laboratories, Takasaki, Japan) (9). Serum concentrations of free T<sub>4</sub> (reference range, 9.0–20.6 pmol/liter), free T<sub>3</sub> (2.6–5.7 pmol/liter), and TSH (0.3–5.0 mU/liter) were measured by enzyme immunoassays (Dainabot Co., Tokyo, Japan).

### Statistical analysis

Grouped data were expressed as means ± SD. Treatment effects (pre- vs. post-T<sub>4</sub> replacement) were analyzed by the paired *t* test in case of normal distribution and by the Wilcoxon signed rank test in case of nonparametric distribution. Significance was defined as a corresponding *P* value of less than 0.05 (two-sided). Spearman's rank correlation was used to assess the correlation between the reduction of non-HDL-C and the reduction of associated lipoproteins and apolipoproteins.

## Results

The characteristics and lipid profiles of patients with OH and SH before and after L-T<sub>4</sub> replacement are listed in Table 1. Before correction of the hypothyroid state, the mean TSH level was 72.5 ± 27.7 mU/liter in patients with OH and 9.46 ± 3.48 mU/liter in patients with SH. After L-T<sub>4</sub> replacement, the serum levels of TSH and free T<sub>4</sub> were within the normal range in all patients. Body mass indices were unchanged in both OH and SH.

In the patients with OH, the levels of serum TC, non-HDL-C, LDL-C, Apo B, and RLP-C were remarkably decreased after L-T<sub>4</sub> replacement (*P* < 0.0005). The serum levels of HDL-C, TG, and Apo A-I were significantly decreased by L-T<sub>4</sub> replacement, although not remarkably decreased (*P* < 0.05). The serum Lp(a) levels were unchanged. In patients with SH, the serum levels of TC, non-HDL-C, RLP-C, and Apo B decreased significantly after L-T<sub>4</sub> replacement. However, the serum LDL-C levels decreased, but these lower levels were not significantly different from the pretreatment levels (*P* = 0.09). The serum levels of TG, HDL-C, Apo A-I, and Lp(a) did not change significantly.

Table 2 presents the Spearman correlation coefficients between the reduction of non-HDL-C and the reduction of associated lipoproteins and apolipoproteins. As expected in view of the way in which non-HDL-C has been calculated, the reduction in the non-HDL-C levels correlated strongly with the reduction in the LDL-C (*r* = 0.96). The reduction in the non-HDL-C levels also correlated strongly with the reduction in the Apo B levels (*r* = 0.95). In addition, the reduction in the non-HDL-C levels correlated with the reduction in the RLP-C (*r* = 0.56). However, the reduction in the non-HDL-C levels did not correlate with the reduction in the HDL-C (*r* = 0.26), Lp(a) (*r* = 0.16), and Apo A-I levels (*r* = 0.37).

## Discussion

The most common abnormalities of lipoprotein metabolism associated with hypothyroidism are elevated levels of TC and LDL-C. These changes are accounted for by the effect of thyroid hormone on lipoprotein lipase activity (10) and the

**TABLE 1.** The characteristics and lipid profiles in patients with OH and SH before and after L-T<sub>4</sub> replacement therapy

|                                      | OH (n = 13)   |                            | SH (n = 26) |                          |
|--------------------------------------|---------------|----------------------------|-------------|--------------------------|
|                                      | Before        | After                      | Before      | After                    |
| Body mass index (kg/m <sup>2</sup> ) | 23.9 ± 3.4    | 23.4 ± 3.4                 | 22.4 ± 3.3  | 22.2 ± 3.2 <sup>a</sup>  |
| TSH (mU/liter)                       | 72.45 ± 27.68 | 2.23 ± 2.58 <sup>a,b</sup> | 9.46 ± 3.48 | 1.81 ± 1.31 <sup>b</sup> |
| Free T <sub>4</sub> (pmol/liter)     | 4.25 ± 2.23   | 17.19 ± 3.16 <sup>b</sup>  | 12.1 ± 2.57 | 15.96 ± 3.6 <sup>b</sup> |
| Free T <sub>3</sub> (pmol/liter)     |               |                            | 3.93 ± 0.54 | 4.24 ± 0.72 <sup>b</sup> |
| TC (mmol/liter)                      | 8.03 ± 1.45   | 5.47 ± 1.05 <sup>b</sup>   | 5.82 ± 0.88 | 5.55 ± 1.02 <sup>b</sup> |
| TG (mmol/liter)                      | 1.04 ± 0.46   | 0.75 ± 0.38 <sup>b</sup>   | 1.2 ± 0.45  | 1.16 ± 0.56              |
| HDL-C (mmol/liter)                   | 2.21 ± 0.81   | 1.82 ± 0.6 <sup>b</sup>    | 1.6 ± 0.47  | 1.59 ± 0.46              |
| LDL-C (mmol/liter)                   | 5.3 ± 1.61    | 3.08 ± 0.79 <sup>b</sup>   | 3.67 ± 0.84 | 3.47 ± 0.9               |
| Apo A-I (mg/dl)                      | 184 ± 51      | 164 ± 38 <sup>b</sup>      | 142 ± 22    | 141 ± 21 <sup>a</sup>    |
| Apo B (mg/dl)                        | 147 ± 36      | 96 ± 25 <sup>b</sup>       | 102 ± 17    | 94 ± 17 <sup>a,b</sup>   |
| Lp(a) (mg/dl)                        | 20 ± 10       | 18 ± 13                    | 18 ± 15     | 16 ± 15                  |
| RLP-C (mmol/liter)                   | 0.14 ± 0.03   | 0.09 ± 0.03 <sup>b</sup>   | 0.13 ± 0.05 | 0.11 ± 0.05 <sup>b</sup> |
| Non-HDL-C (mmol/liter)               | 5.82 ± 1.52   | 3.65 ± 0.95 <sup>b</sup>   | 4.22 ± 0.91 | 3.96 ± 0.98 <sup>b</sup> |

Values are expressed as the mean ± SD. Replacement effects of L-T<sub>4</sub> were analyzed by paired *t* test and <sup>a</sup> by Wilcoxon signed rank test for nonparametric distribution.

<sup>b</sup> *P* < 0.05 vs. before L-T<sub>4</sub> replacement therapy.

**TABLE 2.** Correlation between the reduction of non-HDL-C and the reduction of associated lipoproteins and apolipoproteins

| Variable       | Correlation (r) |
|----------------|-----------------|
| Lipoprotein    |                 |
| LDL-C          | 0.96            |
| HDL-C          | 0.26            |
| RLP-C          | 0.56            |
| Lp(a)          | 0.16            |
| Apolipoprotein |                 |
| Apo A-1        | 0.37            |
| Apo B          | 0.95            |

Spearman correlation coefficients were used.

expression of the LDL receptor (11) and probably play an important role in atherogenesis in untreated hypothyroidism. In the present study, although we observed significant changes of the LDL-C levels in patients with OH, we did not find these changes in SH. A meta-analysis of the effect of L-T<sub>4</sub> replacement on lipoproteins in SH demonstrated a mean decrease of 0.20 mmol/liter in the TC level and 0.26 mmol/liter in the LDL-C level (12). We may not have observed a significant effect of L-T<sub>4</sub> replacement on the LDL-C levels because of our relatively small sample or the short-term (3 month) treatment period. However, because of the majority of the non-HDL-C being accounted for by LDL-C and a strong correlation between non-HDL-C and LDL-C regarding the reduction, the changes in the non-HDL-C levels in hypothyroidism may be mainly related to changes in the LDL-C levels rather than the other way around.

Although LDL is widely accepted as the major atherogenic lipoprotein, TG-rich lipoproteins such as chylomicron remnants and very low-density lipoprotein remnants still play an important role in atherogenesis. These remnants are taken up by macrophages in the arterial walls to produce foam cells and thus may be a risk factor for atherosclerosis (13). The Adult Treatment Panel III report of the National Institutes of Health placed more emphasis on TG-rich lipoprotein and HDL as secondary targets for lipid-lowering drugs than the Adult Treatment Panel II report, and non-HDL-C has been identified as a secondary target in patients with higher TG levels such as diabetes (14). Our data showed that L-T<sub>4</sub> replacement caused a significant reduction in the remnant lipoprotein levels in patients with OH and SH. In addition, the correlation in changes between remnant lipoprotein and non-HDL-C levels suggested that the changes of not only LDL-C, but also remnant lipoprotein, contribute to the changes of the non-HDL-C levels in hypothyroidism.

As in the previous studies (6, 15), we observed significant changes in the Apo B levels after L-T<sub>4</sub> replacement in patients with OH and SH. The total Apo B concentration is a marker of the atherogenic particles in serum and reflects the number of very low-density lipoprotein and intermediate-density lipoprotein particles as well as the number of LDL particles (16). A previous study demonstrated that Apo B is a more powerful predictor of coronary heart disease than LDL-C (17). Because of the high correlation between non-HDL-C and Apo B in recent studies (14), non-HDL-C is considered a good surrogate marker for Apo B. Our data suggest that non-HDL-C may be an alternative to Apo B in patients with hypothyroidism because of the good correlation.

OH, with its accompanying hypercholesterolemia, is widely recognized as a risk factor for cardiovascular disease (18). On the other hand, although SH is highly prevalent, it is controversial whether SH is a risk factor for cardiovascular disease. A recent study (19) suggested that SH indicated a risk for cardiovascular disease, but the other study suggested that it did not (20). Whether there is an association between non-HDL-C levels and cardiovascular disease in patients with OH and SH remains to be determined.

There were some possible limitations in the present study. The study's sample size was relatively small, and its design was not placebo-controlled. In addition, with only 3 months of treatment and a starting dose of only 25 to 50  $\mu$ g, patients with OH were likely still hypothyroid over a portion of this time and so the effectiveness of the treatment would be likely underestimated. Properly controlled studies are needed to demonstrate whether T<sub>4</sub> replacement therapy alters non-HDL-C levels in patients with hypothyroidism.

In summary, the present study has demonstrated, probably for the first time, that T<sub>4</sub> replacement therapy induces reduction of the non-HDL-C levels, a novel atherogenic indicator, in both OH and SH. Such determination of serum non-HDL-C levels in addition to the already known LDL-C or Apo B may provide relevant information on the cardiovascular risk in hypothyroidism.

### Acknowledgments

Received July 25, 2006. Accepted November 28, 2006.

Address all correspondence and requests for reprints to: Dr. Mitsuru Ito, Kuma Hospital, 8-2-35, Shimoyamate-dori, Chuo-ku, Kobe 650-0011, Japan. E-mail: ito02@kuma-h.or.jp.

Disclosure Statement: The authors have nothing to disclose.

### References

1. Pekkanen J, Linn S, Heiss G, Suchindran CM, Leon A, Rifkind BM, Tyroler HA 1990 Ten-year mortality from cardiovascular disease in relation to cholesterol level among men with and without preexisting cardiovascular disease. *N Engl J Med* 322:1700–1777
2. National Institutes of Health 1994 National Cholesterol Education Program. Second Report of the Expert Panel on Detection, Evaluation, and Treatment of High Blood Cholesterol in Adults (Adult Treatment Panel II). *Circulation* 89:1333–1445
3. Frost PH, Havel RJ 1998 Rationale for use of non-high-density lipoprotein cholesterol rather than low-density lipoprotein cholesterol as a tool for lipoprotein cholesterol screening and assessment of risk and therapy. *Am J Cardiol* 81:26–31
4. Cui Y, Blumenthal RS, Flaws JA, Whiteman MK, Langenberg P, Bachorik PS, Bush TL 2001 Non-high-density lipoprotein cholesterol level as a predictor of cardiovascular disease mortality. *Arch Intern Med* 161:1413–1419
5. Kutty KM, Bryant DG, Farid NR 1978 Serum lipids in hypothyroidism: a re-evaluation. *J Clin Endocrinol Metab* 46:55–56
6. de Bruin TW, van Barlingen H, van Linde-Sibenius Trip M, van Vuurst de Vries AR, Akveld MJ, Erkelens DW 1993 Lipoprotein(a) and apolipoprotein B plasma concentrations in hypothyroid, euthyroid, and hyperthyroid subjects. *J Clin Endocrinol Metab* 76:121–126
7. Ito M, Takamatsu J, Matsuo T, Kameoka K, Kubota S, Fukata S, Tamai H, Miyauchi A, Kuma K, Hanafusa T 2003 Serum concentrations of remnant-like particles in hypothyroid patients before and after thyroxine replacement. *Clin Endocrinol (Oxf)* 58:621–626
8. Ito M, Takamatsu J, Sasaki I, Hiraiwa T, Fukao A, Murakami Y, Isotani H, Miyauchi A, Kuma K, Hanafusa T 2004 Disturbed metabolism of remnant lipoproteins in patients with subclinical hypothyroidism. *Am J Med* 117:696–699
9. Nakajima K, Saito T, Tamura A, Suzuki M, Nakano T, Adachi M, Tanaka A, Tada N, Nakamura H, Campos E 1993 Cholesterol in remnant-like lipoproteins in human serum using monoclonal anti apo B-100 and anti apo A-I immunoaffinity mixed gels. *Clin Chim Acta* 23:53–71
10. Lithell H, Bobberg J, Hellsing K, Ljunghall S, Lundqvist G, Vessby B, Wide L 1981 Serum lipoprotein and apolipoprotein concentrations and tissue li-

- poprotein-lipase activity in overt and subclinical hypothyroidism: the effect of substitution therapy. *Eur J Clin Invest* 11:3–10
11. **Staels B, Van Tol A, Chan L, Will H, Verhoeven G, Auwerx J** 1990 Alterations in thyroid status modulate apolipoprotein, hepatic triglyceride lipase, and low density lipoprotein receptor in rats. *Endocrinology* 127:1144–1152
  12. **Danese MD, Ladenson PW, Meinert CL, Powe NR** 2000 Clinical review 115: effect of thyroxine therapy on serum lipoproteins in patients with mild thyroid failure: a quantitative review of the literature. *J Clin Endocrinol Metab* 85: 2993–3001
  13. **Phillips NR, Waters D, Havel RJ** 1993 Plasma lipoproteins and progression of coronary artery disease evaluated by angiography and clinical events. *Circulation* 88:2762–2770
  14. **Expert Panel on Detection, Evaluation, and Treatment of High Blood Cholesterol in Adults** 2001 Executive summary of the Third Report of the National Cholesterol Education Program (NCEP) Expert Panel on Detection, Evaluation, and Treatment of High Blood Cholesterol in Adults (Adult Treatment Panel III). *JAMA* 285:2486–2497
  15. **Meier C, Staub JJ, Roth CB, Guglielmetti M, Kunz M, Miserez AR, Drewe J, Huber P, Herzog R, Muller B** 2001 TSH-controlled L-thyroxine therapy reduces cholesterol levels and clinical symptoms in subclinical hypothyroidism: a double blind, placebo-controlled trial (Basel Thyroid Study). *J Clin Endocrinol Metab* 86:4860–4866
  16. **Grundey SM** 1998 Hypertriglyceridemia, atherogenic dyslipidemia, and the metabolic syndrome. *Am J Cardiol* 81:18–25
  17. **Lamarche B, Moorjani S, Lupien PJ, Cantin B, Bernard PM, Dagenais GR, Despres JP** 1996 Apolipoprotein A-I and B levels and the risk of ischemic heart disease during a five-year follow-up of men in the Quebec cardiovascular study. *Circulation* 94:273–278
  18. **Cappola AR, Ladenson PW** 2003 Hypothyroidism and atherosclerosis. *J Clin Endocrinol Metab* 88:2438–2444
  19. **Walsh JP, Bremner AP, Bulsara MK, O'Leary P, Leedman PJ, Feddema P, Michelangeli V** 2005 Subclinical thyroid dysfunction as a risk factor for cardiovascular disease. *Arch Intern Med* 165:2467–2472
  20. **Parle JV, Maisonneuve P, Sheppard MC, Boyle P, Franklyn JA** 2001 Prediction of all-cause and cardiovascular mortality in elderly people from one low serum thyrotropin result: a 10-year cohort study. *Lancet* 358:861–865

JCEM is published monthly by The Endocrine Society (<http://www.endo-society.org>), the foremost professional society serving the endocrine community.
